# Supplementary material
Source: publisher site journal article supplement (https://www.dovepress.com/article/560589)
Supplement: Supplementary file 1 [file 560589_Supplemental%20Files.docx]

**Supplementary file 1: Assessing Level of Knowledge About COPD Among Primary Care Providers**

You are invited to participate in a research study entitled “Assessing Level of Knowledge About COPD Among Primary Care Providers.” Our study aims to evaluate the knowledge of COPD among Healthcare providers within primary care facilities.

Please be assured that your identity will be completely anonymous, and no personal identifying information will be collected. There are no consequences for refusing to participate; your participation is entirely voluntary. This survey should take approximately 10-15 minutes to complete. The questionnaire will be deleted after all data have been collected. We hope that you participate in the study.

By answering “Yes” to the following question, you voluntarily agree to participate in this study and give your consent to have your anonymous data used for research purposes.

Are you happy to participate in the study?

- Yes
- No

**Section 1: Professional background**

**Please indicate which best describes you**

1. Gender:

□ Male □ Female

1. Professional background

□ General Practitioner (GP)

□ Family Medicine
 □ Nurse

1. Geographical location

□ Eastern region

□ Central region

□ Western region

□ Southern region

□ Northern region

1. Primary place of work

□ Governmental Hospital

□ Private Hospital

1. Type of clinic

□ Hospital-based

□ Primiry care centres

1. How many years of experience do you have caring for individuals with COPD?

□ < 1 year

□ 1- 4 years

□ 5 – 9 years

□ ≥ 10 years

1. Have you ever received any prior training for managing COPD patients?

□ Yes □ No

1. Do you have sufficient knowledge for managing patients with COPD?

□ Yes □ No

**Please indicate the answer which you think is appropriate.**

| **Item** | **True** | **Fale** | **I don’t Know** |
| --- | --- | --- | --- |
| 1. **In COPD** | | | |
| In COPD the word “chronic” means it is severe. |  |  |  |
| COPD can only be confirmed by breathing tests |  |  |  |
| In COPD there is usually gradual worsening over time |  |  |  |
| In COPD oxygen levels in the blood are always low |  |  |  |
| COPD is unusual in people less than 40 years old |  |  |  |
| 1. **COPD:** | | | |
| More than 80% of COPD cases are caused by cigarette smoking |  |  |  |
| COPD can be caused by occupational dust exposure |  |  |  |
| Longstanding asthma can develop into COPD |  |  |  |
| COPD is commonly an inherited disease |  |  |  |
| Women are less vulnerable to the effects of cigarette smoking than men |  |  |  |
| 1. **The following symptoms are common in COPD** | | | |
| Swelling of ankles |  |  |  |
| Fatigue (tiredness) |  |  |  |
| Wheezing |  |  |  |
| Crushing chest pain |  |  |  |
| Rapid weight loss |  |  |  |
| 1. **Breathlessness in COPD;** | | | |
| Severe breathlessness prevents travel by air. |  |  |  |
| Breathlessness can be worsened by eating large meals |  |  |  |
| Breathlessness means that your oxygen levels are low |  |  |  |
| Breathlessness is a normal response to exercise |  |  |  |
| Breathlessness is primarily caused by a narrowing of the bronchial tubes |  |  |  |
| 1. **Phlegm (sputum)** | | | |
| Coughing phlegm is a common symptom in COPD |  |  |  |
| Clearing phlegm is more difficult if you get dehydrated |  |  |  |
| Bronchodilator inhalers can help clear phlegm |  |  |  |
| Phlegm causes harm if swallowed |  |  |  |
| Clearing phlegm can be assisted by breathing exercises |  |  |  |
| 1. **Chest infection/Exacerbations** | | | |
| Chest infections often cause coughing of blood |  |  |  |
| With chest infection phlegm usually becomes coloured ( yellow or green) |  |  |  |
| Exacerbations ( episodes of worsening) can occur in the absence of a chest infection |  |  |  |
| Chest infections are always associated with a high temperature |  |  |  |
| Steroid tablets should be taken whenever is an exacerbation |  |  |  |
| 1. **Exercise in COPD** | | | |
| Walking is better exercise than breathing exercises to improve fitness |  |  |  |
| Exercise should be avoided as it strains the lungs. |  |  |  |
| Can exercise can help maintain your bone density |  |  |  |
| Exercise helps relieve depression |  |  |  |
| Exercise should be stopped if it makes you breathless |  |  |  |
| 1. **Smoking** | | | |
| Stopping smoking will reduce the risk of heart disease |  |  |  |
| Stopping smoking will slow down further lung damage. |  |  |  |
| Stopping smoking is pointless as the damage is done |  |  |  |
| Stopping smoking usually results in improved lung function. |  |  |  |
| Nicotine replacement therapy is only available on prescription |  |  |  |
| 1. **Vaccination** | | | |
| A flu jab is recommended every year. |  |  |  |
| You can get flu from having a flu jab. |  |  |  |
| You can only have a flu jab if you are 65 or over. |  |  |  |
| A pneumonia jab protects against all forms of pneumonia. |  |  |  |
| You can have a pneumona jab and flu jab on the same day |  |  |  |
| 1. **Inhaled Bronchodilators:** | | | |
| All bronchodilators act quickly (within 10 minutes) |  |  |  |
| Both short and long acting bronchodilators can be taken on the same day |  |  |  |
| Spacers (e.g. nebuhaler, aerochamber) should be dried with a towel after washing. |  |  |  |
| Using a spacer device will increase the amount of drug deposited in the lungs. |  |  |  |
| Tremor may be a side effect of bronchodilators. |  |  |  |
| 1. **Antibiotic treatment in COPD:** | | | |
| To be effective, the course should last at least 10 days. |  |  |  |
| Excessive use of antibiotics can cause resistant bacteria (germs) |  |  |  |
| Antibiotics will clear all chest infections. |  |  |  |
| Antibiotic treatment is necessary for an exacerbation (worsening) however mild. |  |  |  |
| You should seek advice if antibiotics cause severe diarrhoea. |  |  |  |
| 1. **Steroid tablets given for COPD (e.g. prednisolone):** | | | |
| Steroid tablets help strengthen muscles |  |  |  |
| Steroid tablets should be avoided if there is a chest infection |  |  |  |
| The risk of long-term side effects due to steroids is less with short courses than with continuous treatment |  |  |  |
| Indigestion is a common side effect from using steroid tablets |  |  |  |
| Steroid tablets can increase your appetite |  |  |  |
| 1. **Inhaled Steroids. (brown, red or orange):** | | | |
| Inhaled steroids should be stopped if you are given steroid tablets. |  |  |  |
| Steroid inhalers can be used for rapid relief of breathlessness. |  |  |  |
| Spacer devices reduce the risk of getting thrush in the mouth. |  |  |  |
| Steroid inhaler should be taken before your bronchodilator. |  |  |  |
| Inhaled steroids improve lung function in COPD. |  |  |  |

**Supplementary Table 1**. Item-Level Performance of the BCKQ (n = 1,594)

| **Item** | **Difficulty (% Correct)** |
| --- | --- |
| 1 | 26.5% |
| 2 | 64.2% |
| 3 | 72.0% |
| 4* | 18.5% |
| 5 | 61.5% |
| 6 | 69.8% |
| 7 | 69.6% |
| 8 | 66.9% |
| 9* | 20.9% |
| 10* | 20.9% |
| 11 | 63.3% |
| 12* | 15.8% |
| 13* | 15.9% |
| 14 | 66.7% |
| 15 | 63.5% |
| 16* | 14.8% |
| 17 | 65.4% |
| 18* | 16.6% |
| 19 | 65.7% |
| 20 | 68.4% |
| 21 | 71.8% |
| 22 | 65.0% |
| 23 | 71.0% |
| 24* | 16.6% |
| 25 | 71.3% |
| 26* | 14.6% |
| 27 | 68.3% |
| 28 | 65.2% |
| 29* | 16.5% |
| 30* | 18.3% |
| 31 | 67.9% |
| 32* | 17.1% |
| 33 | 72.2% |
| 34 | 72.3% |
| 35* | 13.8% |
| 36 | 75.0% |
| 37 | 72.8% |
| 38* | 20.5% |
| 39* | 13.2% |
| 40* | 17.0% |
| 41 | 70.3% |
| 42* | 12.6% |
| 43* | 22.1% |
| 44* | 17.7% |
| 45 | 63.3% |
| 46* | 16.1% |
| 47 | 67.9% |
| 48* | 14.4% |
| 49 | 64.9% |
| 50 | 67.9% |
| 51* | 18.5% |
| 52 | 68.4% |
| 53* | 18.5% |
| 54* | 15.3% |
| 55 | 68.9% |
| 56* | 16.3% |
| 57* | 16.5% |
| 58 | 65.5% |
| 59 | 64.2% |
| 60 | 62.5% |
| 61* | 16.1% |
| 62* | 15.1% |
| 63 | 65.4% |
| 64* | 18.3% |
| 65* | 10.9% |
| **Items with difficulty < 25% are marked with *** | |
